# Supplementary material for: Assessment of the Role of PAL in Lignin Accumulation in Wheat (Tríticum aestívum L.) at the Early Stage of Ontogenesis
Source: MDPI journal article supplement (doi:10.3390/ijms22189848), 2021-09-12
Supplement: s1 [file ijms-1358931-supplementary.pdf › ijms-1358931-supplementary.pdf]

## Supplementary Material

Table S1: A list of primers for lignin associated genes

| <b>Lignin related genes</b> |        |                         |
|-----------------------------|--------|-------------------------|
|                             | Primer | Sequence (5' -3' )      |
| <b>PAL6</b>                 | PAL6-F | CTCAAGCTCATGTCCTCCACA   |
|                             | PAL6-R | TCAGCACCTTCTTCGACACC    |
| <b>C3H1</b>                 | C3H1-F | GGCTGTGTCCACTTAATG      |
|                             | C3H1-R | TGTCATCACTAAGGTCATAC    |
| <b>C4H1</b>                 | C4H1-F | CAGCCTCCACATCCTCAAG     |
|                             | C4H1-R | CTTAGGACGAGCGAACAATC    |
| <b>4CL1</b>                 | 4CL1-F | CACTCAGCCAGCCAGCAG      |
|                             | 4CL1-R | ACATTACACAAGCAGGAAGAACC |
| <b>Reference genes</b>      |        |                         |
| <b>Actin</b>                | ACT-F  | GCCACACTGTTCCAATCTATGA  |
|                             | ACT-R  | TGATGGAATTGTATGTCGCTTC  |
| <b>ARF</b>                  | ARF-F  | CTGACGCCGAGGATATCCA     |
|                             | ARF-R  | GCCTTGACCATAACCAGTTCCA  |
